# Supplementary material for: A Panel of Urinary Volatile Biomarkers for Differential Diagnosis of Prostate Cancer from Other Urological Cancers
Source: PubMed Central journal article supplement (PMC7464354; doi:10.3390/cancers12082017), 2020-07-23
Supplement: cancers-12-02017-s001.pdf [file cancers-12-02017-s001.pdf]

SUPPLEMENTARY FIGURES

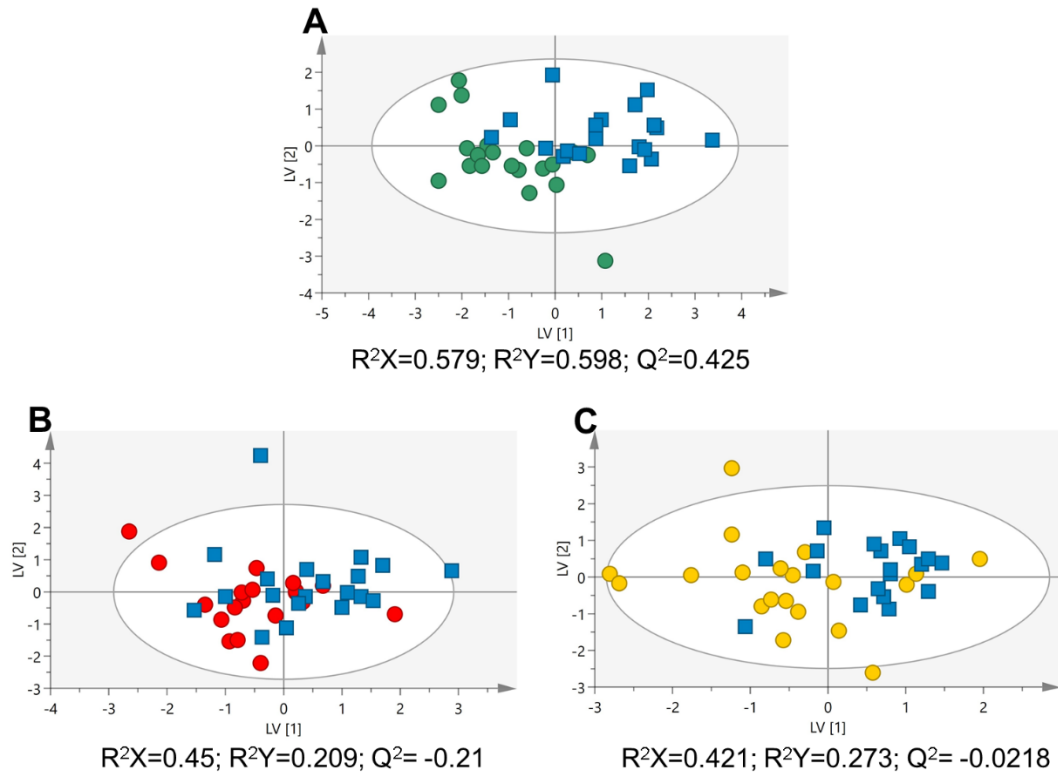

**Supplementary Figure 1.** PLS-DA scores scatter plots (UV scaling; 2 components) obtained for the urinary 6-biomarker panel of (A) PCa patients (n = 19, blue squares) vs. cancer-free controls (n = 20, green circles); (B) PCa (n = 20, blue squares) vs. BC (n = 19, red circles); and (C) PCa (n = 19, blue squares) vs. RC (n = 20, yellow circles).

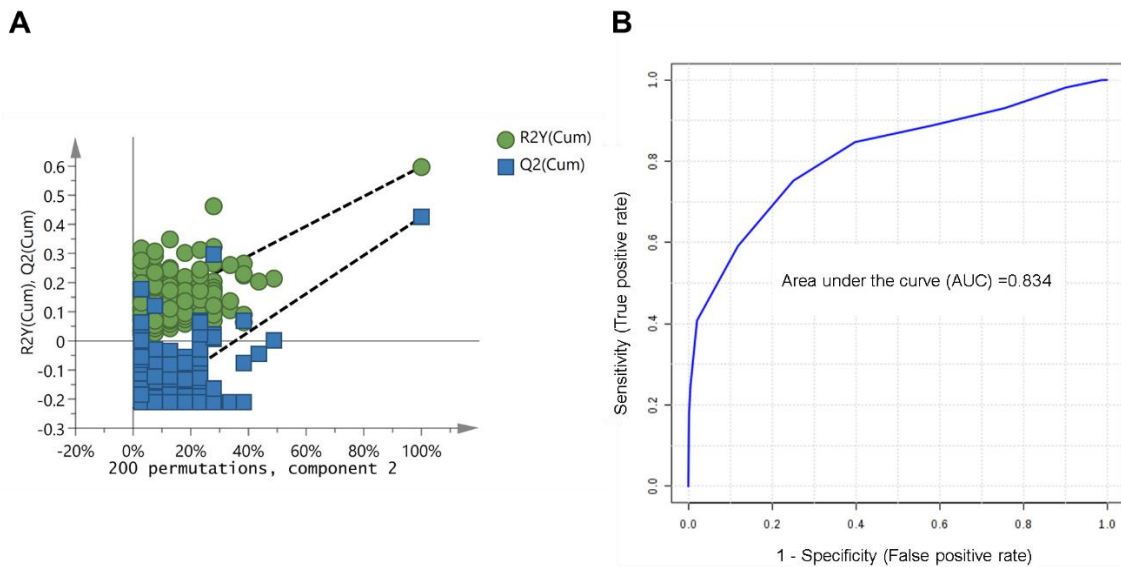

**Supplementary Figure 2.** (A) Statistical validation of the PLS-DA model obtained for the 6-biomarker panel, by permutation testing (200 permutations; 2 components) PCa vs. cancer-free controls [Intercepts:  $R^2 = (0.0, 0.0866)$ ,  $Q^2 = (0.0, -0.234)$ ]; (B) Assessment of the diagnostic performance of the PLS-DA model obtained for the 6-biomarker panel through receiver operating characteristic (ROC) curve, PCa vs. controls (AUC = 0.834; sensitivity = 84%; specificity = 80%; accuracy = 82%).

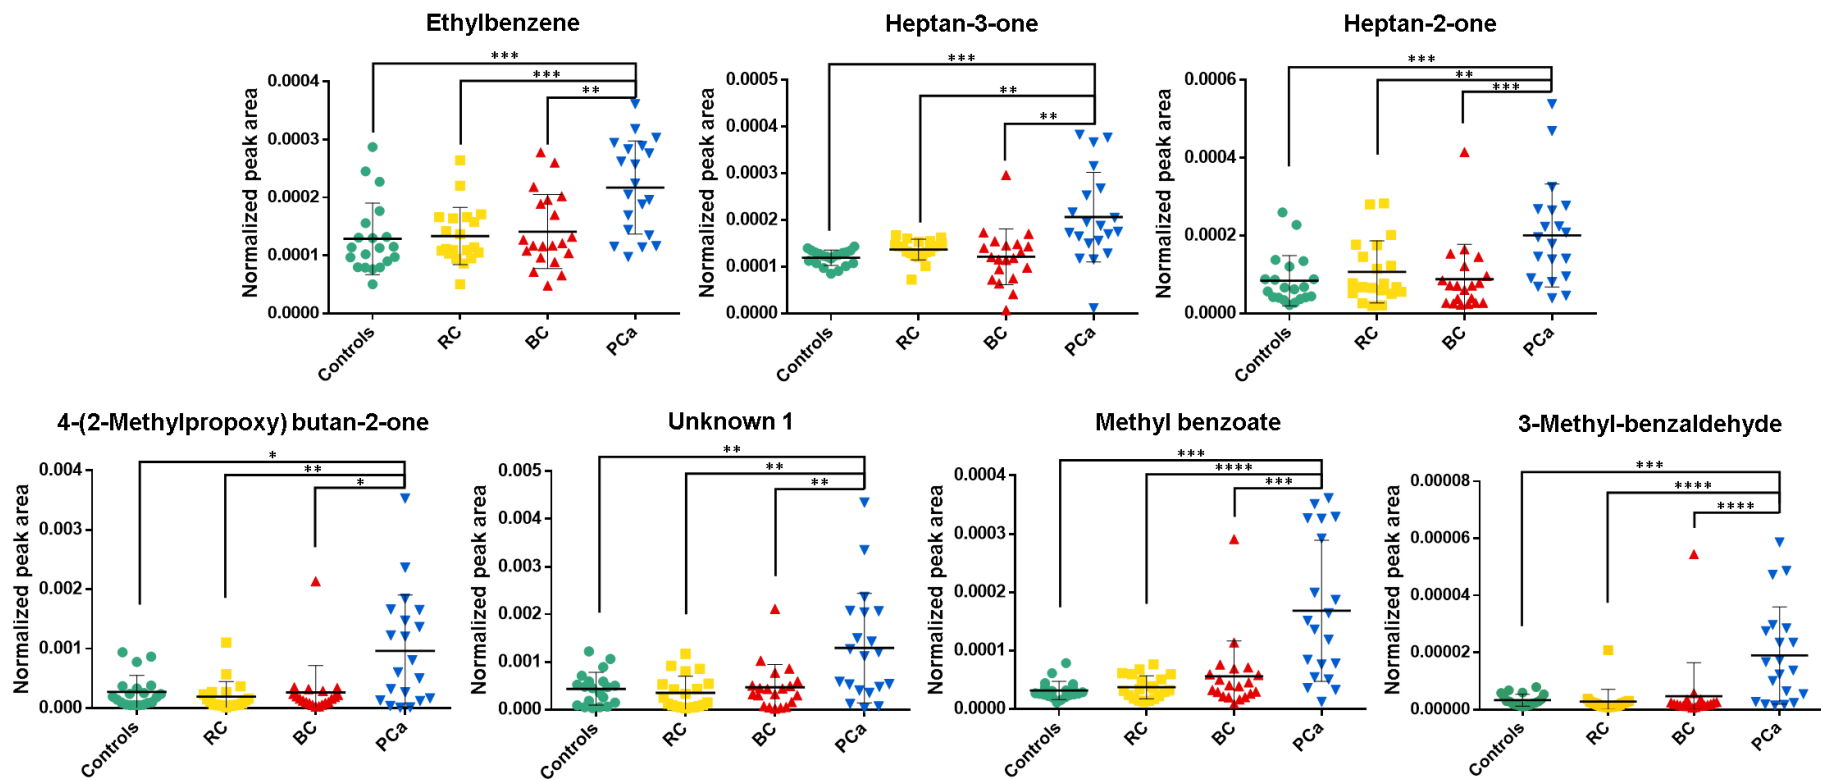

**Supplementary Figure 3.** Boxplots from all metabolites that were simultaneously significantly different between PCa vs. BC, PCa vs. RC and PCa vs. cancer-free controls (\*\*\*\* $p$ -value < 0.0001, \*\*\* $p$ -value < 0.001, \*\* $p$ -value < 0.01, \* $p$ -value < 0.05).

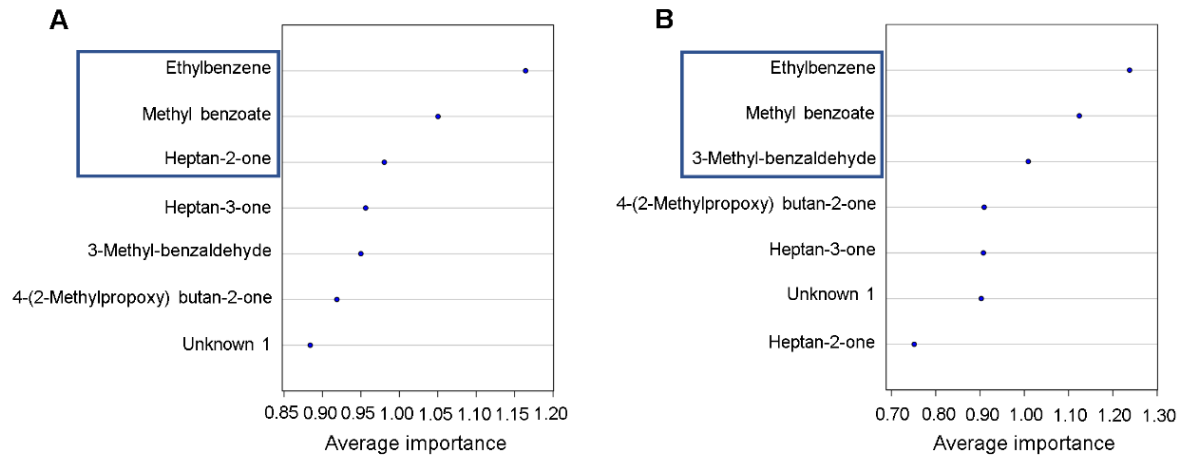

**Supplementary Figure 4.** VIP scores computed through a PLS-DA based algorithm to select the metabolites that best discriminate the groups: **(A)** PCa vs. BC; **(B)** PCa vs. RC.

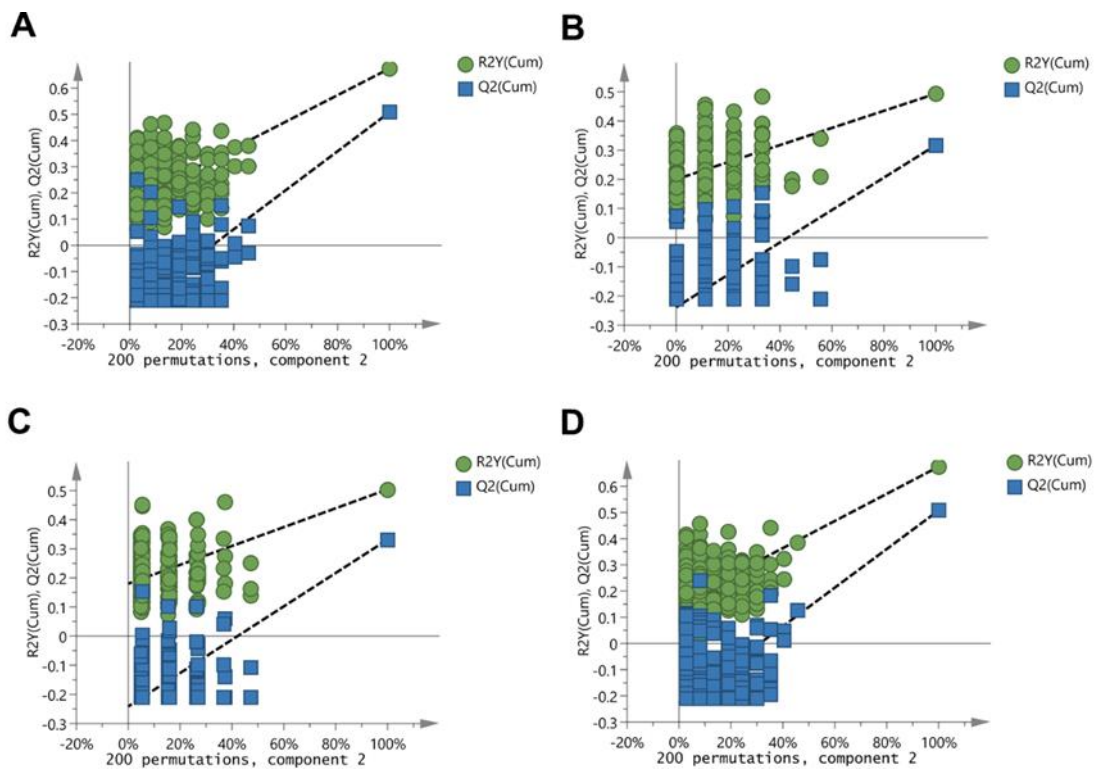

**Supplementary Figure 5.** Statistical validation of the PLS-DA model obtained for the 10-biomarker panel, by permutation testing (200 permutations; 2 components). **(A)** PCa vs. controls [Intercepts:  $R^2 = (0.0, 0.167)$ ,  $Q^2 = (0.0, -0.237)$ ]; **(B)** PCa vs. BC [Intercepts:  $R^2 = (0.0, 0.2)$ ,  $Q^2 = (0.0, -0.238)$ ]; **(C)** PCa vs. RC [Intercepts:  $R^2 = (0.0, 0.18)$ ,  $Q^2 = (0.0, -0.241)$ ]; **(D)** PCa vs. controls plus BC and RC [Intercepts:  $R^2 = (0.0, 0.157)$ ,  $Q^2 = (0.0, -0.229)$ ].

## SUPPLEMENTARY TABLES

**Supplementary Table 1.** 7-Fold cross validation parameters obtained for PLS-DA models of VOCs and VCCs in the untargeted approach.

| Comparison | VOCs |                  |                  |                | VCCs |                  |                  |                |
|------------|------|------------------|------------------|----------------|------|------------------|------------------|----------------|
|            | LV   | R <sup>2</sup> X | R <sup>2</sup> Y | Q <sup>2</sup> | LV   | R <sup>2</sup> X | R <sup>2</sup> Y | Q <sup>2</sup> |
| PCa vs. BC | 2    | 0.544            | 0.773            | 0.655          | 2    | 0.414            | 0.742            | 0.554          |
| PCa vs. RC | 2    | 0.403            | 0.772            | 0.477          | 2    | 0.702            | 0.628            | 0.394          |

**Supplementary Table 2.** Univariate statistical analysis results of VOCs and VCCs significantly altered in PCa group compared to BC, RC and cancer-free controls.

| Chemical name (IUPAC)          | Protocol | <i>p</i> -value | PCa vs. BC                  |                                | <i>p</i> -value | PCa vs. RC                  |                                | <i>p</i> -value | PCa vs. Controls            |                                |
|--------------------------------|----------|-----------------|-----------------------------|--------------------------------|-----------------|-----------------------------|--------------------------------|-----------------|-----------------------------|--------------------------------|
|                                |          |                 | Variation ± uncertainty (%) | Effect size ± ES <sub>SE</sub> |                 | Variation ± uncertainty (%) | Effect size ± ES <sub>SE</sub> |                 | Variation ± uncertainty (%) | Effect size ± ES <sub>SE</sub> |
| Ethylbenzene                   | VOCs     | 0.0021          | 91.15 ± 16.80               | 0.83 ± 0.45                    | 0.0004          | 62.77 ± 12.00               | 1.23 ± 0.67                    | 0.0002          | 68.59 ± 13.07               | 1.21 ± 0.66                    |
| Heptan-3-one                   | VOCs     | 0.0021          | 69.75 ± 15.41               | 1.04 ± 0.65                    | 0.0048          | 50.64 ± 12.83               | 0.98 ± 0.64                    | 0.0007          | 72.56 ± 13.35               | 1.24 ± 0.67                    |
| Heptan-2-one (2-Heptanone)     | VOCs     | 0.0005          | 126.37 ± 24.58              | 0.98 ± 0.64                    | 0.0082          | 87.09 ± 22.36               | 0.84 ± 0.63                    | 0.0003          | 137.2 ± 23.00               | 1.10 ± 0.65                    |
| 4-(2-Methylpropoxy)butan-2-one | VOCs     | 0.0124          | 264.40 ± 37.95              | 0.93 ± 0.64                    | 0.0035          | 398.07 ± 37.60              | 1.10 ± 0.65                    | 0.0210          | 251.4 ± 35.36               | 0.98 ± 0.64                    |
| Methyl benzoate                | VOCs     | 0.0002          | 200.05 ± 26.93              | 1.15 ± 0.66                    | <0.0001         | 350.68 ± 26.59              | 1.48 ± 0.69                    | <0.0001         | 430.1 ± 27.21               | 1.56 ± 0.70                    |
| Unknown 1                      | VOCs     | 0.0061          | 175.99 ± 31.57              | 0.92 ± 0.64                    | 0.0013          | 267.36 ± 32.60              | 1.09 ± 0.65                    | 0.0075          | 195.7 ± 30.10               | 0.99 ± 0.65                    |
| 3-Methyl-benzaldehyde          | VCCs     | <0.0001         | 305.49 ± 39.22              | 0.96 ± 0.64                    | <0.0001         | 572.98 ± 36.09              | 1.27 ± 0.67                    | 0.0003          | 476.8 ± 34.50               | 1.27 ± 0.67                    |

The statistical significance (*p*-values), percentage of variation, effect size (ES), standard error (ES<sub>SE</sub>) are represented for each volatile compound. .

**Supplementary Table 3.** Characterization of VOCs and VCCs significantly altered in PCa group compared to BC, RC and cancer-free controls. They are characterized by their IUPAC name, retention time, characteristic ions (*m/z*), Kovat indices (KI) from literature, experimental KI, NIST R-match, CAS registry number and human metabolome database (HMDB) code.

| Chemical name (IUPAC)          | Protocol | Retention time | <i>m/z</i>                            | KI from literature | Experimental KI | R-match | CAS number | Identification Level | HMDB        |
|--------------------------------|----------|----------------|---------------------------------------|--------------------|-----------------|---------|------------|----------------------|-------------|
| Ethylbenzene                   | VOCs     | 6.44           | 91; 106; 51; 65; 77; 78; 92; 50; 105  | 855                | -               | 853     | 100-41-4   | L1                   | HMDB0059905 |
| Heptan-3-one                   | VOCs     | 7.10           | 57; 85; 72; 114                       | 877                | 884             | 845     | 106-35-4   | L2                   | HMDB0031482 |
| Heptan-2-one                   | VOCs     | 7.20           | 58; 71; 59                            | 891                | 887             | 835     | 110-43-0   | L1                   | HMDB0003671 |
| 4-(2-Methylpropoxy)butan-2-one | VOCs     | 8.47           | 71; 72; 57; 55; 101; 89               | 964                | -               | 735     | 31576-33-7 | L2                   | -           |
| Methyl benzoate                | VOCs     | 13.29          | 105; 77; 55; 51; 136; 57; 71; 50      | 1094               | -               | 856     | 93-58-3    | L1                   | HMDB0033968 |
| Unknown 1                      | VOCs     | 10.75          | 57; 59; 69; 89; 56; 71; 87; 58        | -                  | 1009            | -       | -          | L4                   | -           |
| 3-Methyl-benzaldehyde          | VCCs     | 29.98          | 315; 77; 91; 182; 65; 79; 285; 78, 89 | 1845               | -               | 788     | 620-23-5   | L1                   | HMDB0029637 |

L1: Identified metabolites (GC-MS analysis of the metabolite of interest and a chemical reference standard of suspected structural equivalence, with all analyses performed under identical analytical conditions within the same laboratory); L2: Putatively annotated compounds (spectral (MS) similarity with NIST database); L4: Unidentified.

**Supplementary Table 4.** Demographic and clinical data of prostate cancer (PCa), bladder cancer (BC) and renal cancer (RC) male patients and cancer-free male controls included in this study.

| <b>Characteristics</b>       | <b>PCa</b>   | <b>BC</b>    | <b>RC</b>    | <b>Controls</b> |
|------------------------------|--------------|--------------|--------------|-----------------|
| Number of subjects           | 20           | 20           | 20           | 20              |
| Mean Age $\pm$ SD (years)    | 67 $\pm$ 8.1 | 69 $\pm$ 8.6 | 71 $\pm$ 7.7 | 58 $\pm$ 2.8    |
| PSA (ng/mL), <i>n</i> (%)    |              |              |              |                 |
| <4                           | 1 (5%)       | -            | -            | -               |
| 4-10                         | 7 (35%)      | -            | -            | -               |
| >10                          | 4 (20%)      | -            | -            | -               |
| Not available                | 8 (40%)      | 20 (100%)    | 20 (100%)    | 20 (100%)       |
| Gleason score, <i>n</i> (%)  |              |              |              |                 |
| $\leq$ 6                     | 7 (35%)      | -            | -            | -               |
| =7                           | 9 (45%)      | -            | -            | -               |
| $\geq$ 10                    | 3 (15%)      | -            | -            | -               |
| Not available                | 1 (5%)       | 20 (100%)    | 20 (100%)    | 20 (100%)       |
| Clinical stage, <i>n</i> (%) |              |              |              |                 |
| 0                            | -            | 9 (47%)      | 2 (10%)      | -               |
| I                            | 7 (35%)      | 6 (32%)      | 11 (55%)     | -               |
| II                           | 3 (15%)      | 2 (11%)      | 1 (5%)       | -               |
| III                          | 2 (10%)      | -            | 5 (25%)      | -               |
| IV                           | 6 (30%)      | 2 (11%)      | 1 (5%)       | -               |
| Not available                | 2 (10%)      | -            | -            | -               |
